# Supplementary material for: Improvements in lung function with budesonide/glycopyrrolate/formoterol fumarate metered dose inhaler versus dual therapies in patients with COPD: a sub-study of the ETHOS trial
Source: PubMed Central journal article supplement — Ther Adv Respir Dis. 2021 Aug 24;15:17534666211034329. doi: 10.1177/17534666211034329 (PMC8392797; doi:10.1177/17534666211034329), 2021-08-24
Supplement: sj-pdf-4-tar-10.1177_17534666211034329.pdf [file sj-pdf-4-tar-10.1177_17534666211034329.pdf]

Reviewer 3 v.1

Comments to the Author

Well written and designed. Interesting findings

You are correct that it would be speculative/premature to use triple therapy to prevent/slow lung decline. However, Would appreciate a few sentences in the discussion related to your thoughts on the following:

How do your findings potentially impact current GOLD recs for triple therapy (if at all). If not, what further data would be necessary for that to happen?

There is not a strong correlation of PFTs to symptoms typically. What is the clinical significance (if any) to the changes observed in lung function? Would have been nice to link these lung function numbers to the CAT scores in the original ETHOS study.
