# Supplementary material for: Improvements in lung function with budesonide/glycopyrrolate/formoterol fumarate metered dose inhaler versus dual therapies in patients with COPD: a sub-study of the ETHOS trial
Source: PubMed Central journal article supplement — Ther Adv Respir Dis. 2021 Aug 24;15:17534666211034329. doi: 10.1177/17534666211034329 (PMC8392797; doi:10.1177/17534666211034329), 2021-08-24
Supplement: sj-pdf-6-tar-10.1177_17534666211034329.pdf [file sj-pdf-6-tar-10.1177_17534666211034329.pdf]

## Supplementary material

**Table S1. Change from baseline<sup>a</sup> in morning pre-dose trough FEV<sub>1</sub> and FEV<sub>1</sub> AUC<sub>0-4</sub> at Week 24 by baseline blood eosinophil count (efficacy estimand; PFT sub-study mITT population<sup>b</sup>)**

| Baseline eosinophil count                                |                 | BGF<br>320/18/9.6 µg              | BGF<br>160/18/9.6 µg              | BGF<br>320/18/9.6 µg               | BGF<br>160/18/9.6 µg               |
|----------------------------------------------------------|-----------------|-----------------------------------|-----------------------------------|------------------------------------|------------------------------------|
|                                                          |                 | <i>versus</i><br>GFF<br>18/9.6 µg | <i>versus</i><br>GFF<br>18/9.6 µg | <i>versus</i><br>BFF<br>320/9.6 µg | <i>versus</i><br>BFF<br>320/9.6 µg |
| <b>Morning pre-dose trough FEV<sub>1</sub>, mL</b>       |                 |                                   |                                   |                                    |                                    |
| <b>&lt;100 cells/mm<sup>3</sup></b><br><b>n=330</b>      | LSM             | -10                               | -37                               | 59                                 | 32                                 |
|                                                          | (95% CI)        | (-69, 48)                         | (-93, 19)                         | (2, 116)                           | (-22, 87)                          |
|                                                          | <i>p</i> -value | 0.7323                            | 0.1958                            | 0.0416                             | 0.2459                             |
| <b>100-&lt;300 cells/mm<sup>3</sup></b><br><b>n=1770</b> | LSM             | 37                                | 40                                | 76                                 | 79                                 |
|                                                          | (95% CI)        | (11, 63)                          | (15, 66)                          | (50, 102)                          | (54, 105)                          |
|                                                          | <i>p</i> -value | 0.0052                            | 0.0020                            | <0.0001                            | <0.0001                            |
| <b>≥300 cells/mm<sup>3</sup></b><br><b>n=413</b>         | LSM             | 59                                | 62                                | 89                                 | 93                                 |
|                                                          | (95% CI)        | (-7, 124)                         | (-2, 127)                         | (27, 151)                          | (32, 154)                          |
|                                                          | <i>p</i> -value | 0.0787                            | 0.0593                            | 0.0047                             | 0.0029                             |
| <b>FEV<sub>1</sub> AUC<sub>0-4</sub>, mL</b>             |                 |                                   |                                   |                                    |                                    |
| <b>&lt;100 cells/mm<sup>3</sup></b><br><b>n=330</b>      | LSM             | 15                                | -25                               | 134                                | 94                                 |
|                                                          | (95% CI)        | (-43, 74)                         | (-81, 31)                         | (76, 192)                          | (38, 149)                          |
|                                                          | <i>p</i> -value | 0.6108                            | 0.3792                            | <0.0001                            | 0.0009                             |
| <b>100-&lt;300 cells/mm<sup>3</sup></b><br><b>n=1767</b> | LSM             | 51                                | 48                                | 115                                | 113                                |
|                                                          | (95% CI)        | (23, 78)                          | (20, 75)                          | (87, 144)                          | (85, 141)                          |
|                                                          | <i>p</i> -value | 0.0004                            | 0.0006                            | <0.0001                            | <0.0001                            |
| <b>≥300 cells/mm<sup>3</sup></b><br><b>n=413</b>         | LSM             | 93                                | 86                                | 123                                | 116                                |
|                                                          | (95% CI)        | (23, 163)                         | (17, 156)                         | (57, 189)                          | (58, 181)                          |
|                                                          | <i>p</i> -value | 0.0091                            | 0.0149                            | 0.0003                             | 0.0005                             |

<sup>a</sup>Baseline was defined as the mean of the 30- and 60-minute values prior to dosing on Day 1, if available; otherwise, the mean of the 30- and 60-minute pre-bronchodilator assessments at Visit 3 were used, if available; otherwise, the mean of the 30- and 60-minute pre-bronchodilator assessments at Visit 2 were used.

<sup>b</sup>mITT population: BGF 320/18/9.6 µg, *n*=747; BGF 160/18/9.6 µg, *n*=807; GFF 18/9.6 µg, *n*=779; BFF 320/9.6 µg, *n*=755.

AUC<sub>0-4</sub>, area under the curve from 0–4 hours post-dose; BFF, budesonide/formoterol fumarate; BGF, budesonide/glycopyrrolate/formoterol fumarate; CI, confidence interval; FEV<sub>1</sub>, forced expiratory volume in 1 second; GFF, glycopyrrolate/formoterol fumarate; LSM, least squares mean; mITT, modified intent-to-treat; PFT, pulmonary function test.

**Table S2. Adjusted rate of decline in morning pre-dose trough FEV<sub>1</sub> and FEV<sub>1</sub> AUC<sub>0-4</sub> over 52 weeks (efficacy estimand; PFT sub-study mITT population)**

|                                                                | <b>BGF</b><br><b>320/18/9.6 µg</b><br><i>versus</i><br><b>GFF</b><br><b>18/9.6 µg</b> | <b>BGF</b><br><b>160/18/9.6 µg</b><br><i>versus</i><br><b>GFF</b><br><b>18/9.6 µg</b> | <b>BGF</b><br><b>320/18/9.6 µg</b><br><i>versus</i><br><b>BFF</b><br><b>320/9.6 µg</b> | <b>BGF</b><br><b>160/18/9.6 µg</b><br><i>versus</i><br><b>BFF</b><br><b>320/9.6 µg</b> |
|----------------------------------------------------------------|---------------------------------------------------------------------------------------|---------------------------------------------------------------------------------------|----------------------------------------------------------------------------------------|----------------------------------------------------------------------------------------|
| <b>Morning pre-dose trough FEV<sub>1</sub>, mL<sup>b</sup></b> |                                                                                       |                                                                                       |                                                                                        |                                                                                        |
| Treatment difference                                           | -5.6                                                                                  | -21.1                                                                                 | 16.1                                                                                   | 0.5                                                                                    |
| (95% CI)                                                       | (-29.8, 18.7)                                                                         | (-45.0, 2.7)                                                                          | (-8.0, 40.3)                                                                           | (-23.2, 24.3)                                                                          |
| <b>FEV<sub>1</sub> AUC<sub>0-4</sub>, mL<sup>c</sup></b>       |                                                                                       |                                                                                       |                                                                                        |                                                                                        |
| Treatment difference                                           | 2.4                                                                                   | -14.5                                                                                 | 11.8                                                                                   | -5.2                                                                                   |
| (95% CI)                                                       | (-20.7, 25.6)                                                                         | (-37.2, 8.3)                                                                          | (-11.2, 34.7)                                                                          | (-27.7, 17.4)                                                                          |

<sup>a</sup>Rate of the decline of pre-dose trough FEV<sub>1</sub> is -1 multiplied by the average of the individual slope of pre-dose trough FEV<sub>1</sub> over 52 weeks across patients for the treatment.

<sup>b</sup>Rate of the decline of FEV<sub>1</sub> AUC<sub>0-4</sub> is -1 multiplied by the average of the individual slope of FEV<sub>1</sub> AUC<sub>0-4</sub> over 52 weeks across patients for the treatment.

AUC<sub>0-4</sub>, area under the curve from 0–4 hours post-dose; BFF, budesonide/formoterol fumarate; BGF, budesonide/glycopyrrolate/formoterol fumarate; CI, confidence interval; FEV<sub>1</sub>, forced expiratory volume in 1 second; GFF, glycopyrrolate/formoterol fumarate; mITT, modified intent-to-treat; PFT, pulmonary function test.
